# Supplementary material for: Improving the synthetic H2production catalyst design strategy with the neurotransmitter dopamine
Source: Royal Society of Chemistry journal article supplement (doi:10.1039/d2dt03509j), 2022-12-15
Supplement: d2dt03509j1.pdf [file d2dt03509j1.pdf]

## Supporting Information

for

### Improving synthetic H<sub>2</sub> production catalyst design strategy with neurotransmitter dopamine

Santanu Ghorai,<sup>a</sup> Shikha Khandelwal,<sup>b</sup> Srewashi Das,<sup>a</sup> Surabhi Rai,<sup>a,c</sup> Somnath Guria,<sup>a</sup> Piyali Majumder,<sup>c</sup> and Arnab Dutta\*<sup>a, c, d</sup>

<sup>a</sup>Chemistry Department, Indian Institute of Technology Bombay, Powai, Mumbai, India 400076

<sup>b</sup>Chemistry Discipline, Indian Institute of Technology Gandhinagar, Palaj, India 382355

<sup>c</sup>National Centre of Excellence in CCU, Indian Institute of Technology Bombay, Powai, Mumbai, India 400076.

<sup>d</sup>Interdisciplinary Program in Climate Studies, Indian Institute of Technology Bombay, Powai, Mumbai, India 400076

\*Corresponding author: [arnab.dutta@iitb.ac.in](mailto:arnab.dutta@iitb.ac.in)

## Table of contents

| Content                                                                                                             | Page Number |
|---------------------------------------------------------------------------------------------------------------------|-------------|
| Experimental Section                                                                                                | 3-6         |
| Synthesis of ligands and Complexes                                                                                  | 7-9         |
| FigureS1. Optical spectra of complexes C1-C4 in DMF                                                                 | 10          |
| FigureS2. Optical spectra of complexes C1-C4 in H <sub>2</sub> O                                                    | 10          |
| FigureS3. FTIR spectra of Complexes C1-C4                                                                           | 11          |
| FigureS4. <sup>1</sup> H NMR of complex C2                                                                          | 12          |
| FigureS5. <sup>1</sup> H NMR of complex C3                                                                          | 13          |
| FigureS6. <sup>1</sup> H NMR of complex C4                                                                          | 14          |
| FigureS7. <sup>13</sup> C NMR spectrum of C2 recorded in d <sup>6</sup> -DMSO                                       | 15          |
| FigureS8. <sup>13</sup> C NMR spectrum of C3 recorded in d <sup>6</sup> -DMSO                                       | 16          |
| FigureS9. <sup>13</sup> C NMR spectrum of C4 recorded in d <sup>6</sup> -DMSO                                       | 17          |
| FigureS10. Cyclic voltammetry of complexes C2-C4 in DMF medium                                                      | 18          |
| FigureS11: Cyclic voltammetry of complexes C2-C4 in different pH mediums                                            | 19          |
| Figure S12. Plot of $i_p$ and $i_c$ vs. square root of scan rate recorded for C2                                    | 20          |
| FigureS13. Bulk electrolysis of C2-C4 and detection of Hydrogen gas in Gas chromatography                           | 21          |
| Figure S14. Rinse test of C2-C4 complexes at pH 7.0                                                                 | 22          |
| Figure S15. SEM-EDS analysis of plastic chip working electrode before and after the bulk electrolysis               | 22          |
| Figure S16. <sup>1</sup> H NMR of C2 in dms0-d6 before and after addition of trifluoroacetic acid (TFA).            | 23          |
| Figure S17. Cyclic voltammogram for measuring (A) Turn Over Frequency (TOF) and (B) overpotential requirement (OP). | 23          |
| Figure S18. Cyclic voltammetry and optical spectral data of complexes before and after bulk electrolysis            | 24          |
| Table S1. Optical spectral data of C2-C4 in DMF and aqueous media                                                   | 25          |
| Table S2. The values of $E_{Co^{III/II}}$ and $E_{Cat/2}$ for C2-C4 at different pH conditions (pH 7.0-pH 4.0)      | 26          |
| Table S3. Electrocatalytic and photocatalytic H <sub>2</sub> production parameters of Complex C1-C4                 | 26          |
| Table S4. Bulk electrolysis parameters for complexes C1-C4                                                          | 27          |
| Table S5. Comparative TON of complexes C2-C4                                                                        | 27          |
| Table S6. Comparative catalytic data of contemporary cobalt-based catalysts with C1-C4                              | 27          |
| References                                                                                                          | 28-29       |

## Experimental Section

### Materials and Methods:

All the chemicals, solvents (Avra chemicals, Sigma Aldrich chemicals, and Finar chemicals) need no further purification. Cleaned and dried glass wares were used. Under an N<sub>2</sub> atmosphere Reactions were executed with the help of the schlenk-line technique. NMR spectra were recorded with the help of Bruker Avance II Ascent FT spectrometer (400 MHz) and Bruker Avance II Ascent FT spectrometer (500 MHz) for <sup>1</sup>H. Additionally, NMR solutions were reported in ppm with solutions in dms<sub>o</sub>-d<sub>6</sub> (d~2.5ppm). UV-VIS spectra were recorded in 2 mL Sterna make quartz cuvette having 1 cm pathlength with the help of PerkinElmer Lambda 1050 spectrometers. FTIR spectra of solid samples were studied using KBr pellet on PerkinElmer (Spectrum-I) spectrometer. For determining the mass, HRMS of the samples were determined on Bruker Maxis impact in positive mode. At room temperature cyclic voltammetry (CV) experiments were recorded using Metrohm Autolab PGSTAT 204 potentiostat.

### Electrochemical Studies:

All experimental CVs were studied in dry DMF or in an aqueous buffer medium using 0.1M MES hydrate in Millipore water with a solute concentration in the presence of anhydrous sodium sulphate as a supporting electrolyte. A standard three-electrode system of 1 mm glassy carbon disc as working electrode, Ag/AgCl as a reference electrode connected by Vycor tip, and platinum wire as counter electrode were used as the counter electrode. All potentials are reported versus Fc/Fc<sup>+</sup> for organic medium and [Fe(CN)<sub>6</sub>]<sup>3-/4-</sup> couple for aqueous medium E<sup>0</sup> [Fe(CN)<sub>6</sub>]<sup>3-/4-</sup> = +0.360 V vs. SHE. The system was further connected to Metrohm Autolab PGSTAT 204 using 3 mm glassy carbon rod as a working electrode, Pt wire as a counter electrode, and Ag as a reference electrode with continuous Ar flow. The pH of the aqueous solutions was measured with the help of bench top Labman LMPH-10 pH Meter. For bulk electrolysis setup, a customized four-neck glass vessel (77 mL with headspace), coiled 23 cm Pt wire as a counter electrode, Ag rod as a reference electrode, and plastic carbon chip (1 cm x 2 cm) as working electrode were utilized.<sup>1</sup>

The last neck was closed by a B-14/20 suba seal rubber septum and used for N<sub>2</sub> purging before the experiment and for headspace gas collection for GC measurements. During the experiment, 14 mL of 0.1-0.25 mM complexes were added in the vessel, all electrodes (along with a magnetic bead) were inserted along with a B-14/20 rubber septum cap (gas tight), and

the solution was purged with N<sub>2</sub> for 30 minutes. Purging was stopped, and a chrono-coulometric experiment was started at corresponding catalytic potentials. Solution was stirred continuously with a magnetic stirrer during the experiment. Gastight PTFE leuc lock 1000 series (1001TLL) 1 mL Hamiltonian syringe was used for collecting headspace gas after 1 hour of experiment. It was analyzed via gas chromatography (GC) instrument on TCD/FID mode. Headspace H<sub>2</sub> was detected by using Dhruva CIC gas chromatography (GC) with TCD/FID detector with a 5A° molecular sieve/Porapak at room temperature. The instrument was calibrated manually by using different amounts of a control gas mixture containing 0.5% H<sub>2</sub>, CH<sub>4</sub>, N<sub>2</sub>, and O<sub>2</sub>.

The SEM-EDS study was done with the help of JEOL JSM7600F instrument at accelerating voltage of 5 kV. Energy-dispersive X-ray spectroscopy (EDS) was done with FE-SEM to trace the elemental composition.

**Photocatalytic studies:**

C1-C4 were taken in 10 ml pH 7.0 buffer solution in a test tube, followed by the addition of photosensitizer (EOSIN-Y) and 1 mL triethanolamine (TEOA) as a sacrificial electron donor. The concentration of the complexes in the solution is 0.1mM, and the concentration of the photosensitizer in each solution mixture is 0.2mM. The total volume of the reaction solution is 11mL. For photocatalytic illumination of the sample, Thor lab instrument (SLS301) with 350 -2700nm with 350-610nm bandpass filter used for filtering visible light required Eosin-Y PS. For all experiments, the beam size(3.80cm<sup>2</sup>) and laser-power (40 mW/cm<sup>2</sup>) were constant. Before starting the photo irradiation, each sample was degassed using Argon gas for 5 minutes. At 1 hour 0.5mL of gas was taken from the headspace, and examined the components of gas were through GC.

**Calculation of catalytic rate:**

The rate was calculated using the following equation:

$$\frac{i_c}{i_p=0.4463} = \frac{n}{F\nu} \left( \frac{RTK_{obs}}{F\nu} \right)^{1/2} \dots\dots\dots \text{(Equation S1)}$$

*i<sub>c</sub>*= catalytic current, *i<sub>p</sub>*=stoichiometric current, n= number of electrons transferred, F= Faraday Constant, R= Universal gas constant, T = temperature, K<sub>obs</sub>=observed rate, ν= scan

rate.

### Calculation of TON:

$$\text{TON} = \frac{\text{No. of moles of H}_2 \text{ produced}}{\text{No. of moles of catalyst used}}$$

### Calculation of Faradaic efficiency and TON of Complexes:

#### Current Efficiency of C3 at pH 7.0:

The overall charge passed during the catalytic HER= 5.32 C

The theoretical amount of Hydrogen expected =  $5.32 \text{ C} / (96485 \times 2\text{C}) \text{ mol} = 27.55 \text{ micro moles}$

Experimentally H<sub>2</sub> detected in headspace by GC= 26.45 micromoles

Faradaic efficiency of C3=  $26.45/27.55 = 95.34\%$

Amount of C3 in the solution= 1.0 micromoles

TON=  $(26.45/1.0)=26.45$

#### Current Efficiency of C4 at pH 7.0:

The overall charge passed during the catalytic HER= 12.06 C

The theoretical amount of Hydrogen expected =  $12.06 \text{ C} / (96485 \times 2\text{C}) \text{ mol} = 62.41 \text{ micro moles}$

Experimentally H<sub>2</sub> detected in headspace by GC= 41.53 micro moles

Faradaic efficiency of C4 =  $41.53/62.41=66.54\%$

Amount of C4 in the solution= 2.5 micromoles

TON=  $(41.53/2.5)=16.61$

#### Current Efficiency of C3 at pH 6.0:

The overall charge passed during the catalytic HER= 22.34 C

The theoretical amount of Hydrogen expected =  $22.34 \text{ C} / (96485 \times 2\text{C}) \text{ mol} = 116.0 \text{ micro}$

moles

Experimentally H<sub>2</sub> detected in headspace by GC= 104.2 micro moles

Faradaic efficiency of C3=  $104.2/116.0=89.82\%$

Amount of C3 in the solution= 0.83 micromoles

TON=  $(104.2/0.83)=125$

#### **Current Efficiency of C4 at pH 6.0:**

The overall charge passed during the catalytic HER= 23.55 C

The theoretical amount of Hydrogen expected =  $23.55 \text{ C} / (96485 \times 2\text{C}) \text{ mol} = 122.3 \text{ micro moles}$

Experimentally H<sub>2</sub> detected in headspace by GC= 110.4 micro moles

Faradaic efficiency of C4=  $110.4/122.3=90.27\%$

Amount of C4 in the solution= 1.2 micromoles

TON=  $(110.4/1.2)=92$

#### **Current Efficiency of C4 at pH5:**

The overall charge passed during the catalytic HER= 4.4 C

The theoretical amount of Hydrogen expected =  $4.4 \text{ C} / (96485 \times 2\text{C}) \text{ mol} = 22.84 \text{ micro moles}$

Experimentally H<sub>2</sub> detected in headspace by GC= 20.54 micromoles

Faradaic efficiency of C4= $20.54/22.84 = 90\%$

Amount of C4 in the solution= 0.83 micromoles

TON=  $(20.54/0.83)=24.75$

#### **Current Efficiency of C2 at pH7:**

The overall charge passed during the catalytic HER=7.96 C

The theoretical amount of Hydrogen expected= $7.96 \text{ C} / (96485 \times 2\text{C}) \text{ mol} = 41.25 \text{ micro moles}$

Experimentally  $\text{H}_2$  detected in headspace by GC= 30.63 micro moles

Faradaic efficiency of  $\text{C}_2 = 30.63/41.25 = 74\%$

Amount of  $\text{C}_2$  in the solution= 3.5 micromoles

TON=  $(30.63/3.5) = 8.77$

## Synthetic Procedure:

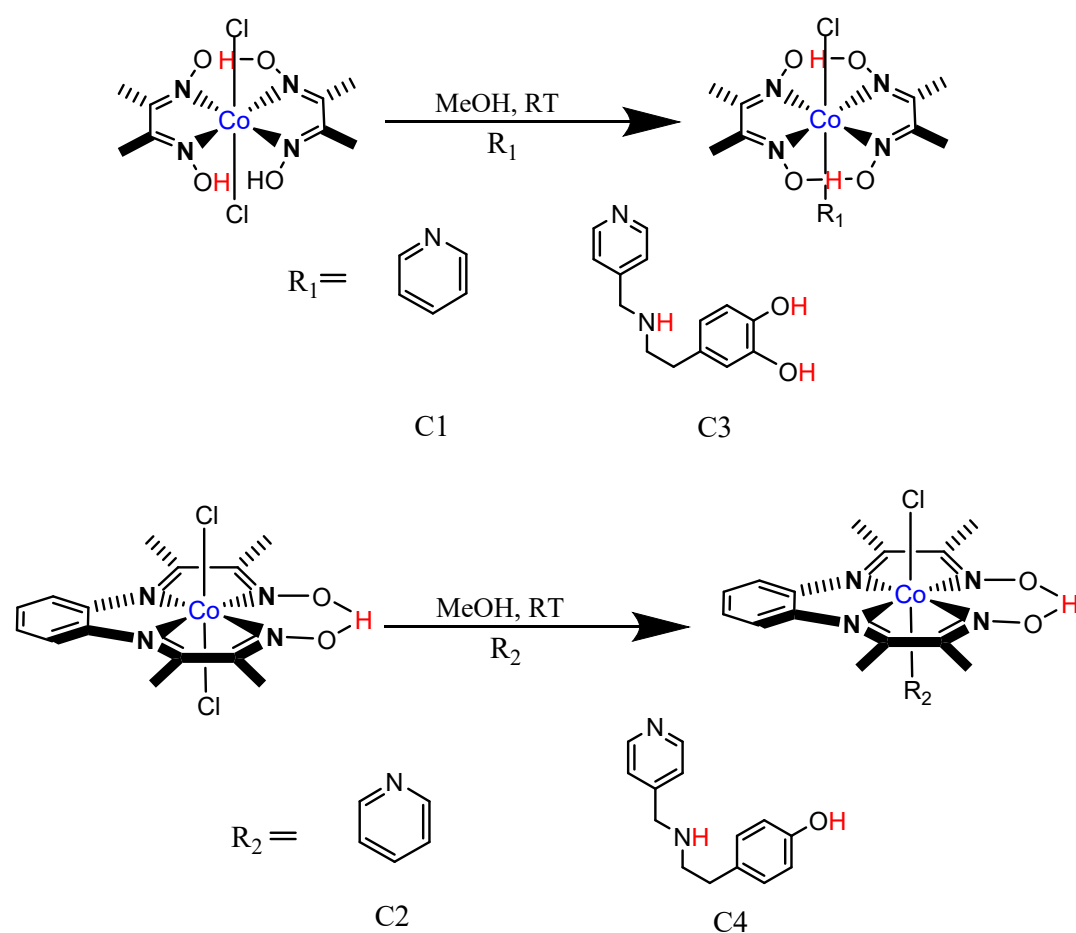

**Scheme S1.** Synthetic procedure for obtaining complexes C1-C4.

### 1.2.1. Synthesis of Copdd core (L1):

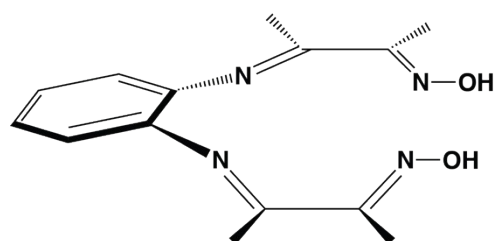

*o*-phenylenediamine (0.009 mol) was dissolved in 30 ml hot distilled water with continuous stirring. When *o*-phenylenediamine got dissolved completely, then diacetyl monoxime (0.018 mol) was added into it with constant stirring. It was allowed to reflux this dark yellow liquid for about 5 hours first, cooled the liquid at room temperature and then on an ice bath for 2 hours. The yellow product precipitated out of the solution. This precipitate was washed trice with cold water and twice with cold ether and allowed to dry under vacuum.



**L1:** Yield: 80%. <sup>1</sup>H NMR (500 MHz, DMSO-d<sub>6</sub>) δ (ppm): 1.94(s, 6H, -CH<sub>3</sub>); 2.69(s, 6H, -CH<sub>3</sub>); 7.73(dd, 2H, *J* = 6.4, 3.4 Hz, Ar-H); 7.97 (dd, 2H, *J* = 6.4, 3.5 Hz, Ar-H); 11.37 (s, 2H, -NOH). HRMS (ESI, positive mode) *m/z* for [M+H]<sup>+</sup> ion calculated: 402.0055, obtained: 402.004.

### 1.2.2. Synthesis of L3:

For the synthesis of L3 ligand, Dopamine hydrochloride (4.5 mM) was taken in 50ml ethanol: water (2:1 ratio) solution, followed by addition of Sodium Carbonate (9 mM). After Dopamine hydrochloride was completely soluble, 4-pyridine carboxaldehyde (4.5 mM) was added slowly into the solution. Then, the reaction mixture was stirred continuously for 2 hours at room temperature. White color precipitate appeared. The precipitate was filtered and washed thoroughly with water and ether, respectively and dried under air.

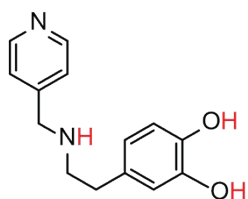

The white precipitate was dissolved in 30ml cold methanol under N<sub>2</sub> atmosphere—thereby leading to white turbid solution. The whole reaction mixture was kept in an ice bath till the temperature came down to -5<sup>o</sup> C. Sodium Borohydride (1.5 mM) was very slowly added, and the reaction mixture was stirred for 2 hours. The yellow color complete clear solution appeared. Then, the reaction mixture was treated with dilute hydrochloric acid until the pH adjusted to 7. Then the mixture was evaporated and dried under vacuum.

**L3:** Yield: 80%. <sup>1</sup>H NMR (500MHz, DMSO-d<sub>6</sub>) δ (ppm): 8.46(dd,2H, Ar-H); 7.26(dd,2H, Ar-H); 6.05(s, 1H, Ar-H); 5.59(dd,1H, Ar-H); 4.78(dd, 1H, Ar-H); 2.8 (t, 2H, NH-CH<sub>2</sub>-CH<sub>2</sub>); 2.6 (t,2H, Ar-CH<sub>2</sub>-CH<sub>2</sub>); 3.17(s,2H, Ar-CH<sub>2</sub>). HRMS (ESI, positive mode) *m/z* for [M+H]<sup>+</sup> ion calculated: 243.1128, obtained: 243.1128.

Synthesis of tyramine amine ligand(L4): L4 was prepared according to the literature<sup>2</sup>.

Synthesis of cobalt complex(C1): Complex C1 was prepared according to the literature<sup>3</sup>.

### Synthesis of cobalt complex (C2):

L1 core (0.001 mol) was dissolved in 15 ml ethanol, then pyridine (0.0011 mol) was slowly added to stirring solution of the Copdd complex. Allow this solution to stir for 10 hours. After the addition of pyridine, the color of the solution turned brown from green. The precipitate will form in the reaction mixture. Filter the brown color precipitate formed and wash this precipitate with cold diethyl ether, and dry under vacuum.

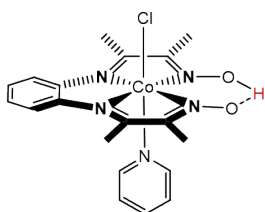

**C2:** Yield: 56%. <sup>1</sup>H NMR (500 MHz, D<sub>2</sub>O) δ (ppm): 2.33(s, 6H, -CH<sub>3</sub>); 2.52(s, 6H, -CH<sub>3</sub>); 7.25-7.29 (m,1H, Ar-H); 7.77 (tt, *J* = 7.7 Hz, 1H, Ar-H); 7.88-8.04 (m, 4H, Ar-H); 8.54 (tt, *J* = 8 Hz, 1H, Ar-H); 8.69-8.73 (m, 2H, Ar-H). HRMS (ESI, positive mode) *m/z* for [C<sub>19</sub>H<sub>21</sub>Cl<sub>2</sub>CoN<sub>5</sub>O<sub>2</sub>]<sup>+</sup>: Calculated: 480.0488; Experimental: 480.03667.

### Synthesis of C3:

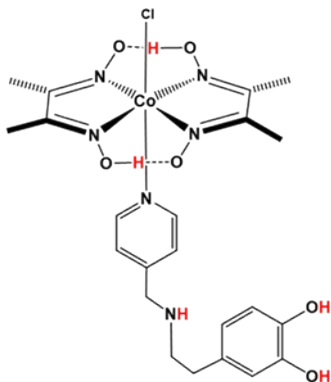

For the synthesis of C3,  $\text{Co}(\text{mgCl}_2)$  was taken in a 10 ml dry methanol solution. Then L3 ligand was added slowly. The reaction mixture was refluxed for 3 hours. Then the solution was left for one day in the freeze. Brown color precipitate appeared. The precipitate was filtered and washed with dry ether and dried under a vacuum.

C3: Yield:64%.  $^1\text{H NMR}$  (500MHz,  $\text{DMSO-d}_6$ )  $\delta$  (ppm): 18.75 (s, 2H, H-bonded oxime); 10.14 (s, 1H, -NH); 9.3-9.6(s, 2H, -2OH); 8.43(d,2H,Ar-H); 7.77(d,2H,Ar-H); 6.94(s,1H,Ar-H); 6.33(s,1H,Ar-H); 5.94(s,1H,Ar-H); 3.54(s,1H,-NH); 3.49(s,2H,- $\text{CH}_2$ ); 3.3-3.2(t,2H,- $\text{CH}_2$ ); 3.2-2.9(t,2H,- $\text{CH}_2$ ); 2.84 (s, 12H, 4 $\text{CH}_3$ ). HRMS (ESI, positive mode):  $m/z$  for  $[\text{C}_{22}\text{H}_{30}\text{ClCoN}_6\text{O}_6]^+$ : Calculated: 567.1163; Experimental: 567.1164.

### Synthesis of C4:

For the synthesis of C4, we followed the same synthetic procedure as of C3. Here we used L4 ligand instead of L3. Brown color precipitate came. It was washed with methanol and ether respectively and dried under vacuum.

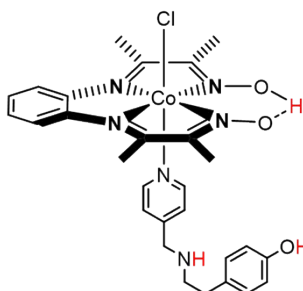

C4: Yield:73%.  $^1\text{H NMR}$  (500MHz,  $\text{dmsO-d}_6$ )  $\delta$  (ppm): 18.45 (s, 1H, H-bonded oxime); 9.32(dd,2H, Ar-H); 8.83(dd,2H, Ar-H); 8.09(dd,2H, Ar-H); 7.53(dd,2H, Ar-H); 7.01(dd,2H, Ar-H); 6.69(d,2H, Ar-H); 3.40(s,2H,- $\text{CH}_2$ ); 3.21-3.07(t,2H,- $\text{CH}_2$ ); 2.79-2.71(t,2H,- $\text{CH}_2$ ); 2.33 (s, 12H, 4 $\text{CH}_3$ ). HRMS (ESI, positive mode):  $m/z$  for  $[\text{C}_{28}\text{H}_{33}\text{N}_6\text{O}_4\text{Cl}]^+$ : Calculated: 613.0707; Experimental: 613.0576.

### Supplementary Figures:

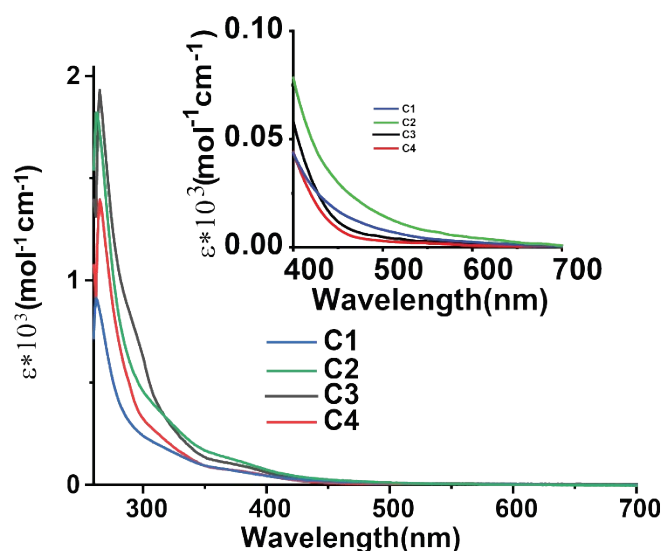

**Figure S1.** Optical spectra of C1-C4 recorded in a DMF medium at room temperature (blue trace C1, orange trace C2, black trace C3, red trace C4). The *d-d* transitions are shown in the inset.

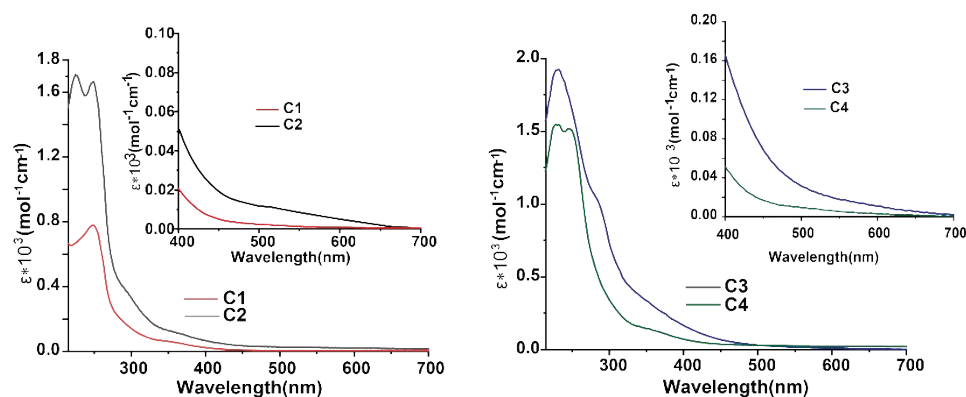

**Figure S2.** Optical spectra of C1-C4 recorded in an aqueous solution at room temperature. The *d-d* transitions are shown in inset.

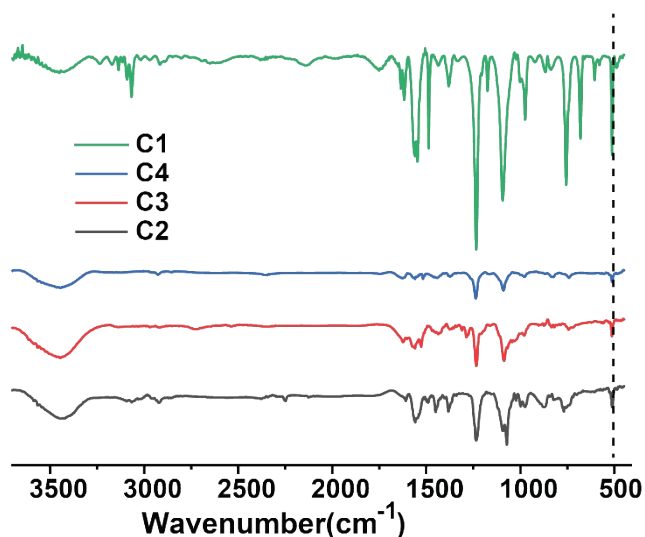

**Figure S3.** The comparative FTIR spectra of C1-C4 complexes using KBr pellet at room temperature within scanning range 400 to 4000  $\text{cm}^{-1}$ .

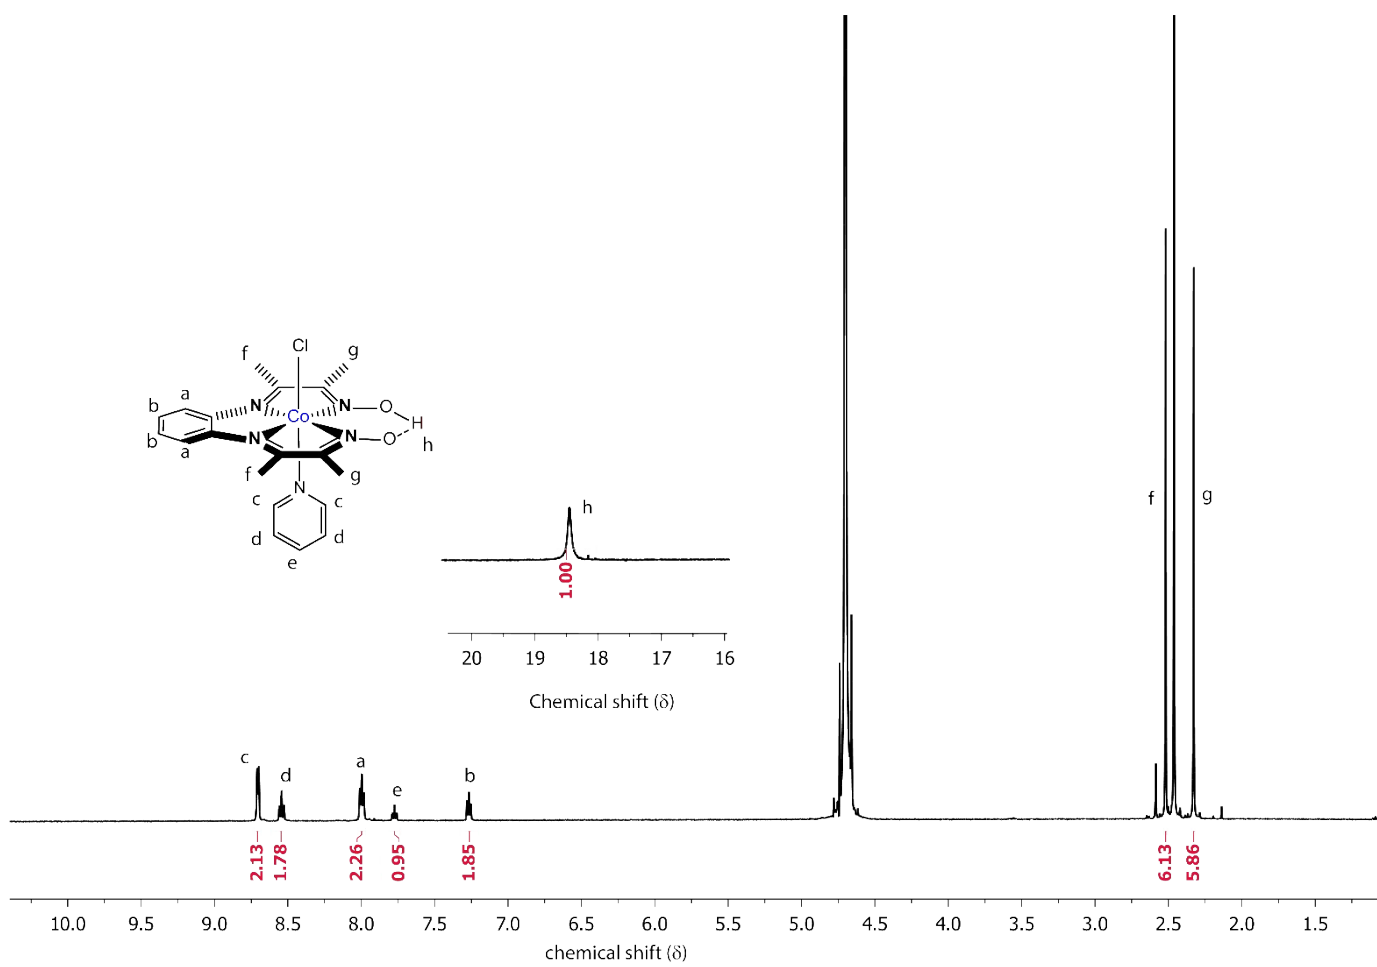

**Figure S4.**  $^1\text{H}$  NMR spectrum of **C2** recorded in  $\text{D}_2\text{O}$ . Oxime peak recorded in  $\text{dms}\text{-}d_6$  is shown in the inset.

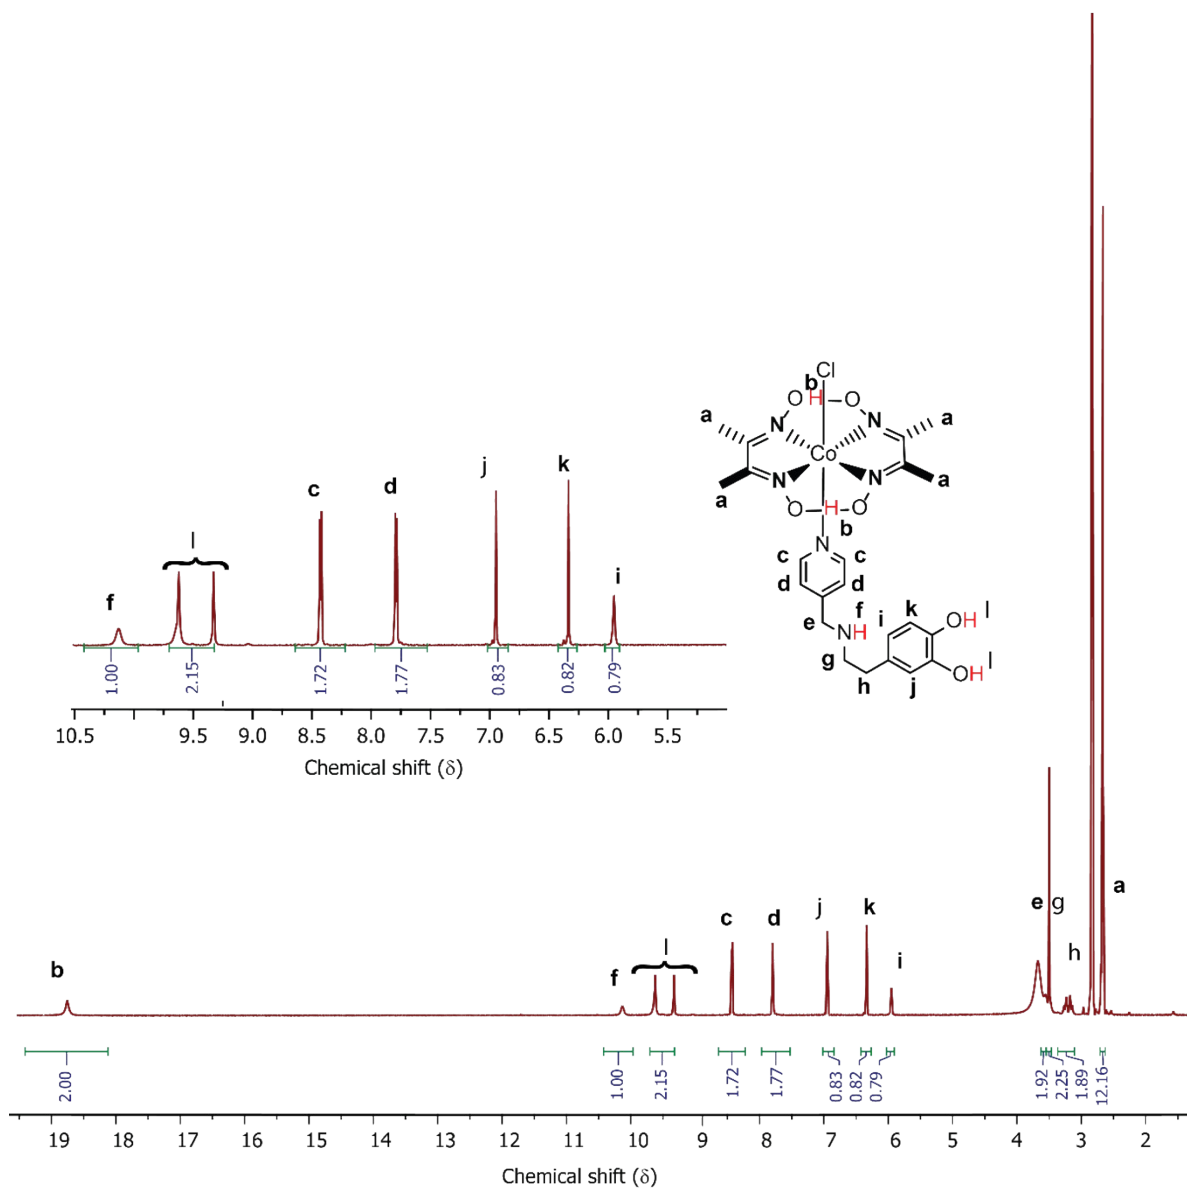

**Figure S5.** <sup>1</sup>H NMR spectrum of C3 recorded in d<sup>6</sup>-DMSO showing the peak for H-bonded oxime peak at 18.8 ppm.

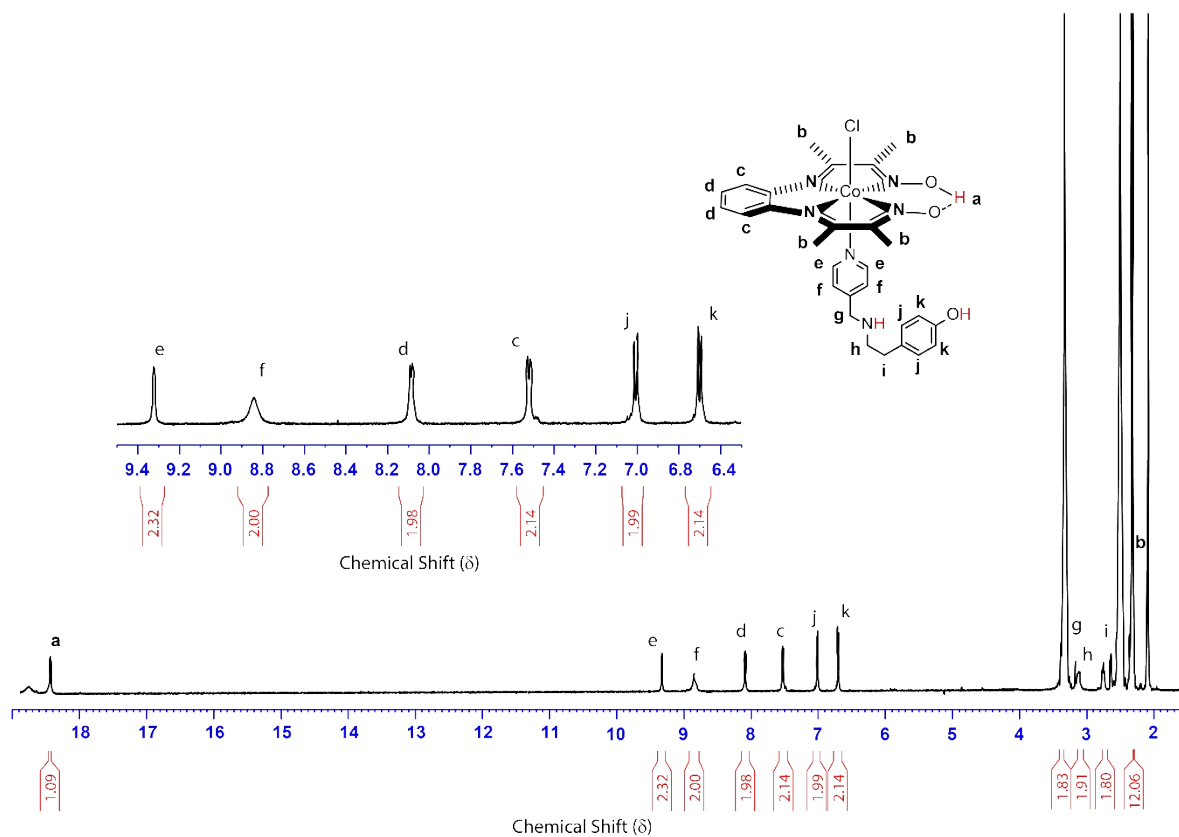

**Figure S6.**  $^1\text{H}$  NMR spectrum of **C4** recorded in  $d^6$ -DMSO showing the peak for H-bonded oxime peak at 18.8 ppm.

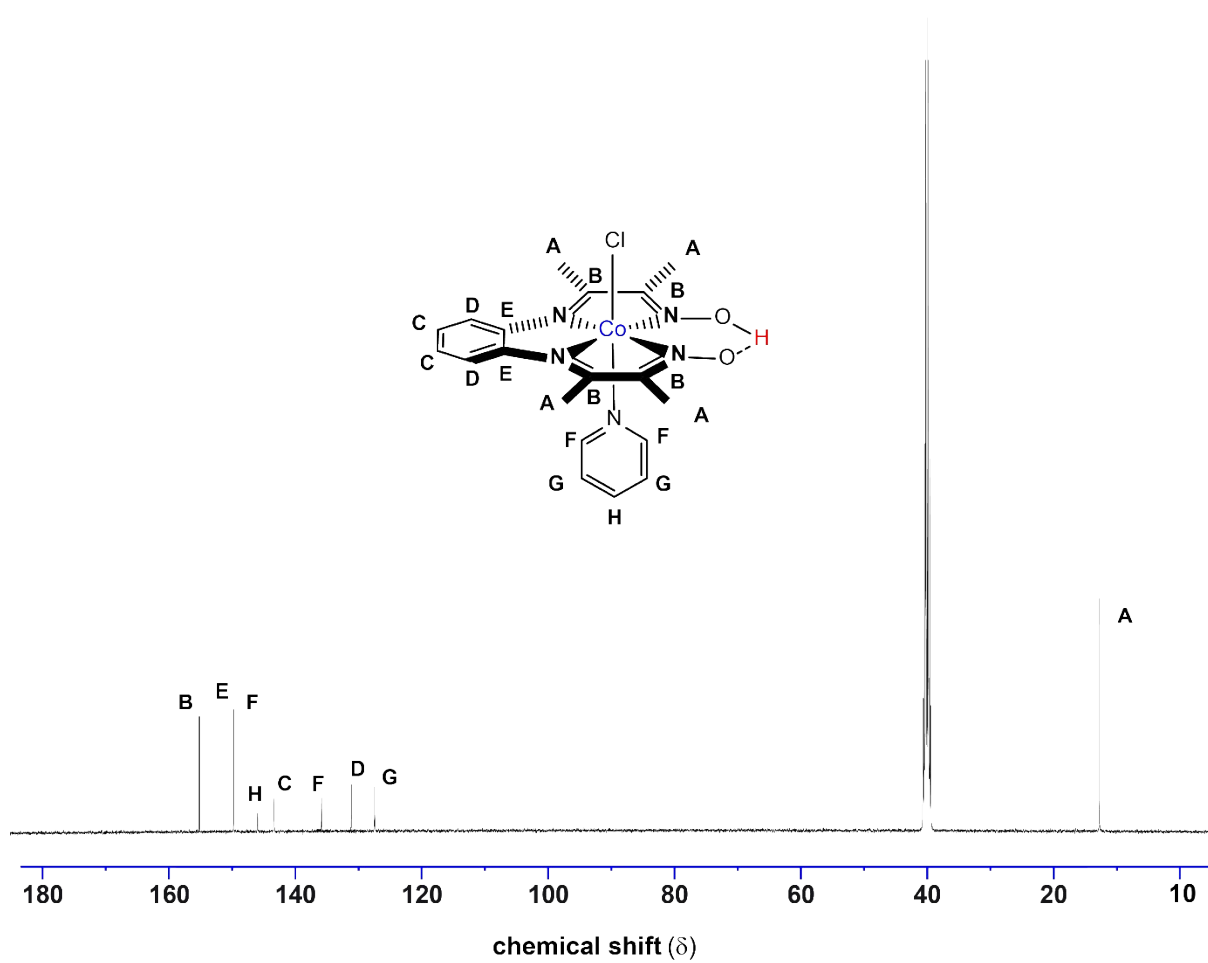

**Figure S7.**  $^{13}\text{C}$  NMR spectrum of **C2** recorded in  $\text{d}^6\text{-DMSO}$ .

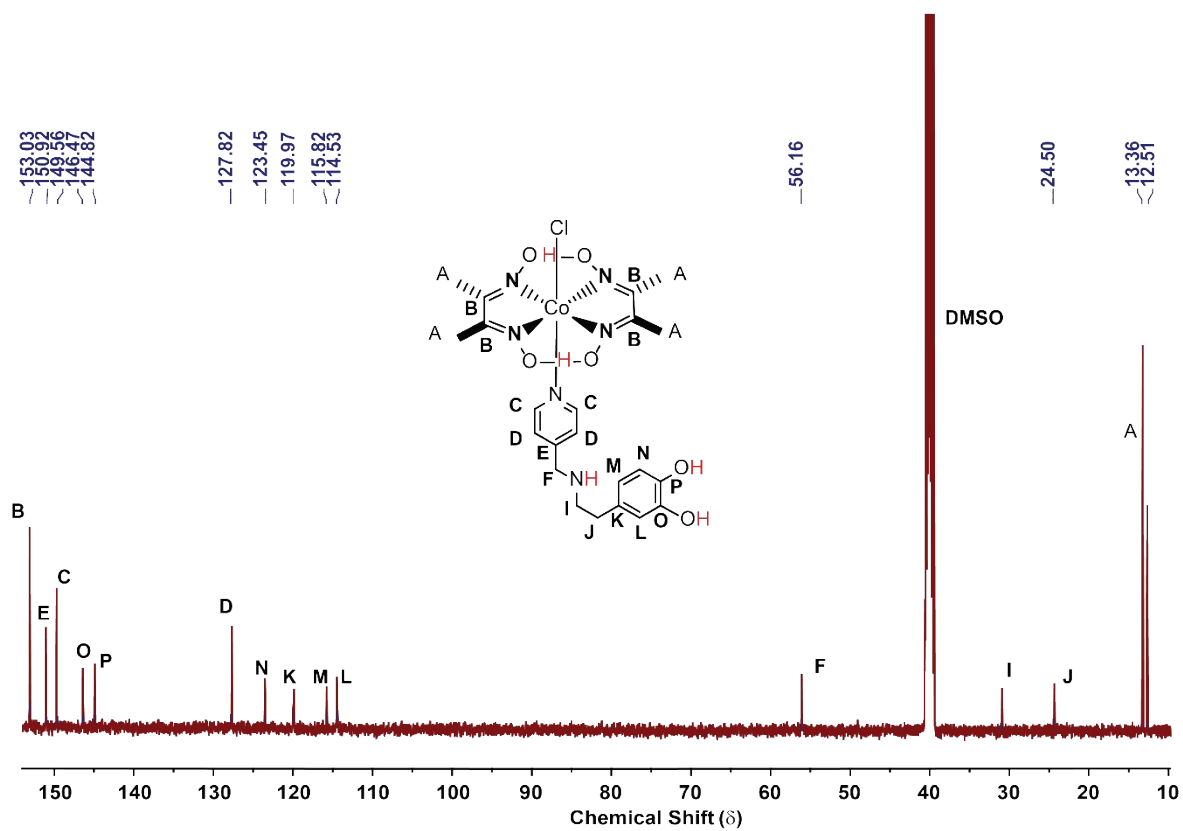

**Figure S8.**  $^{13}\text{C}$  NMR spectrum of **C3** recorded in  $d_6$ -DMSO.



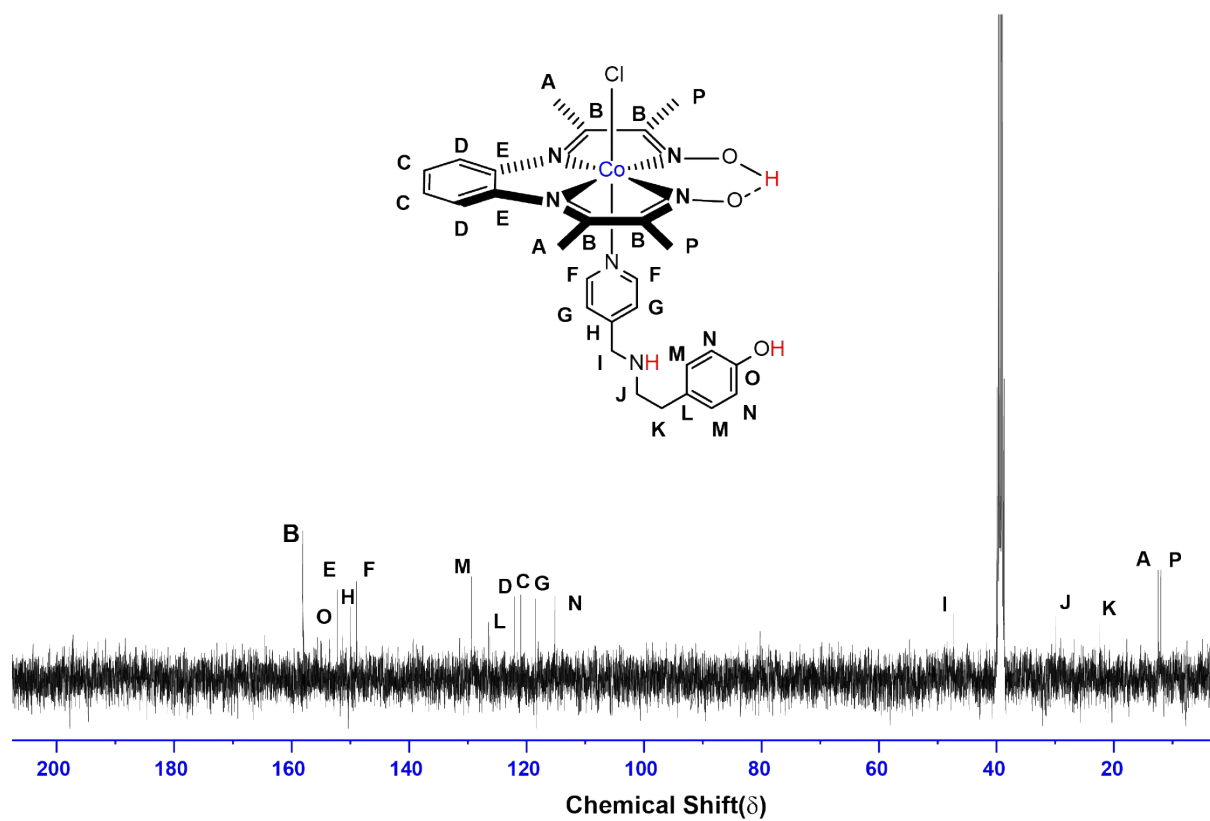

**Figure S9.**  $^{13}\text{C}$  NMR spectrum of **C4** recorded in  $\text{d}^6\text{-DMSO}$ .

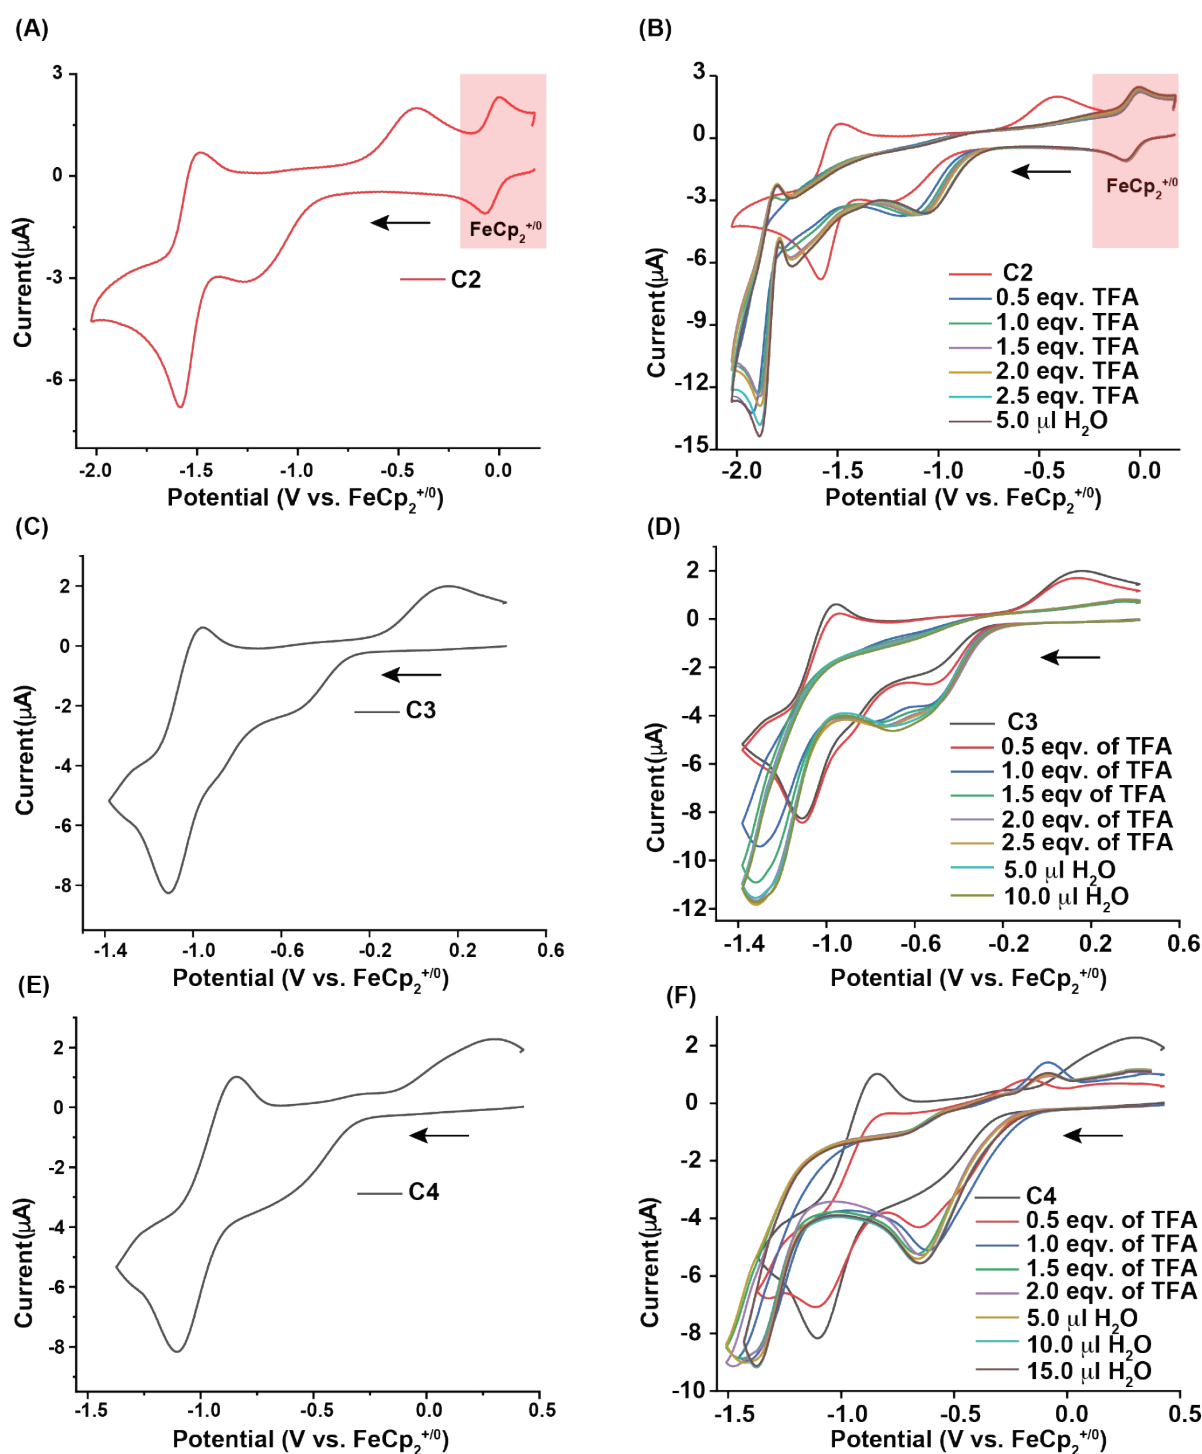

**Figure S10.** The comparative cyclic voltammograms (CVs) of C2-C4 in DMF medium (A, C, and E) followed by the serial addition of Trifluoroacetic acid (TFA) and water (B, D, and F). Here glassy carbon disc working electrode, Ag/AgCl reference electrode, Pt-wire counter electrode was used along with TBAF as supporting electrolyte. The scan rate for each complex at different acid concentration is 1V/s. The initial scan direction is displayed by the black arrows.

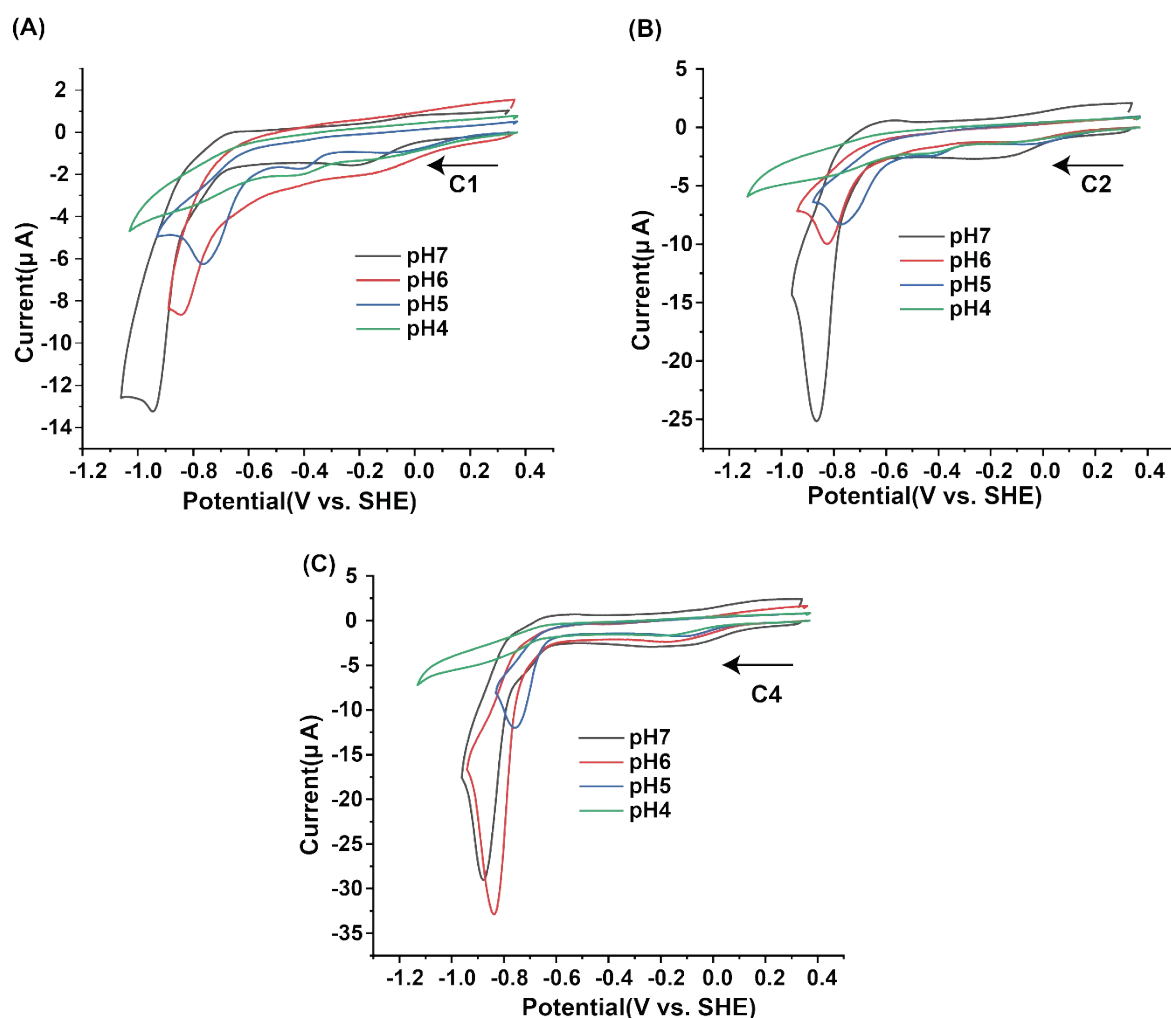

**Figure S11.** Cyclic voltammetry of (A-D) C1-C4 in different pH solutions ranging from pH 4-pH 7 under Ar atmosphere at different scan rates. The scan rate for each pH for each complex indicates the current independent region. Utilized electrodes: working electrode-glassy carbon disc 1 mm diameter, reference electrode- Ag/AgCl, and counter electrode- platinum wire. pH7(black), pH6(red), pH5(blue), pH4(green) are shown in the figure.

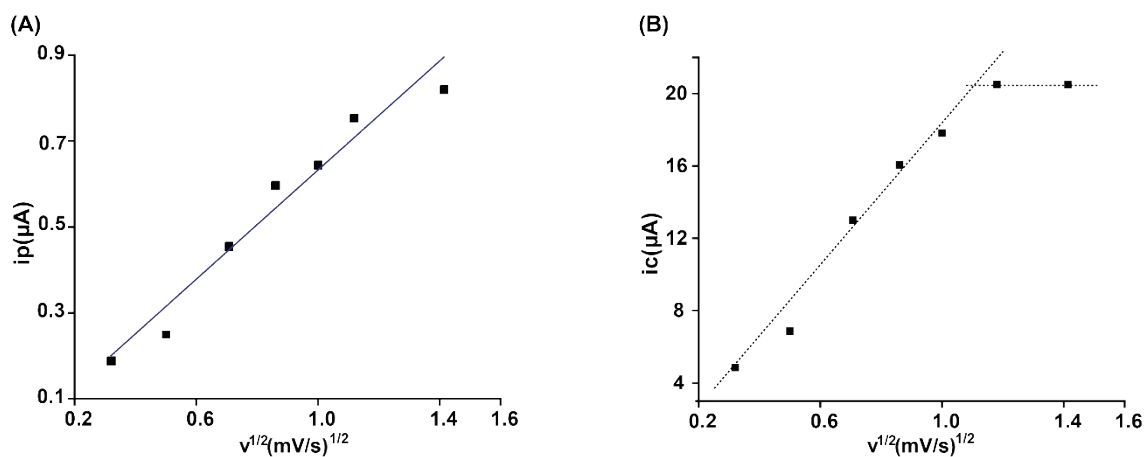

**Figure S12.** (A) Plot of  $i_p$  vs. square root of scan rate recorded for C2. The linear increase in the current with scan rate shows the stoichiometric nature of the signal. (B) Plot of  $i_c$  vs. square root of scan rate recorded for C2. The non-linear variation at higher scan rate indicates the involvement of catalysis.

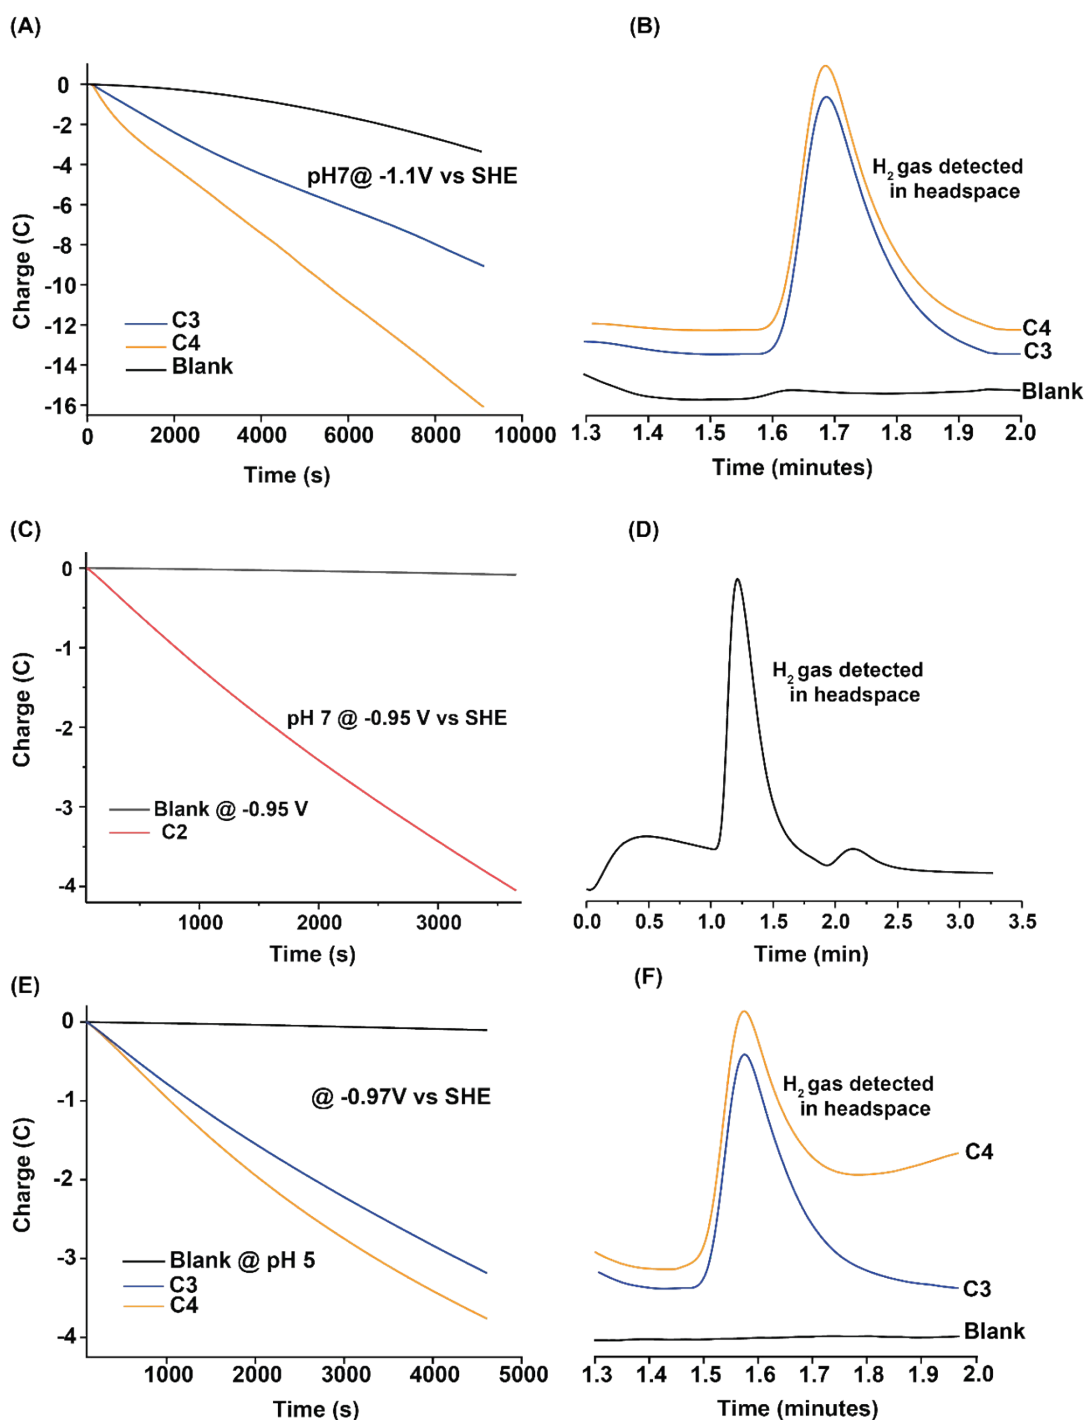

**Figure S13.** Bulk electrolysis data of complexes C1-C4, concentration 0.25mM using plastic chip electrode (2.5 cm x 2 cm) as working electrode, Ag/AgCl (3 M KCl) as reference electrode and coiled Pt-wire as counter electrode. (A) recorded at pH 7.0 at -1.1V vs. SHE for C3 and C4; (C) at pH7.0 at -0.95V vs. SHE for complex C2; (E) at pH5.0 at -0.97V vs. SHE for C3 and C4. (B), (D) and (F) represent corresponding GC data recorded after injecting 0.3ml of headspace gas using leu- lock gas-tight syringe at an interval of 1 hour. Blank (black trace), C2 (red), C3 (blue trace), C4 (yellow trace) are shown in the figure.

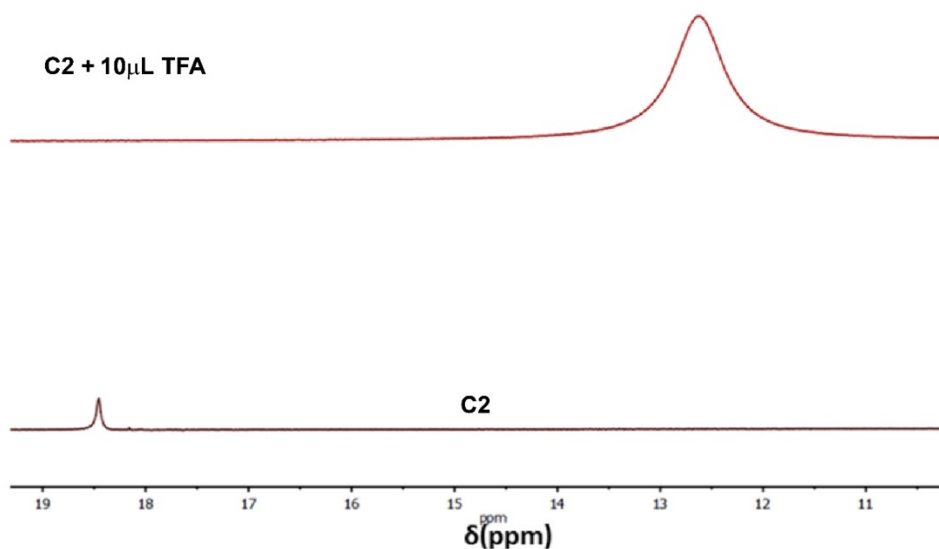

**Figure S14.**  $^1\text{H}$  NMR of **C2** recorded in  $\text{dms}\text{-d}_6$  in the region 10-19 ppm before (below) and after the addition of trifluoroacetic acid (TFA). The hydrogen-bonded oxime peak disappears in the presence of acid.

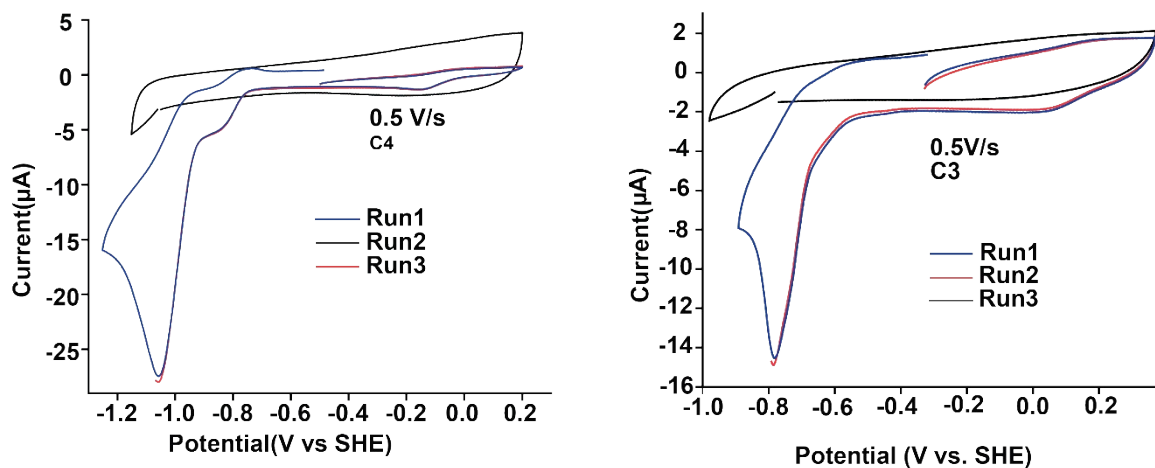

**Figure S15.** Rinse test of complexes **C3-C4** at 0.5 V/s. Three independent CV runs were recorded. A complete CV was carried out in the corresponding buffer medium in the first run. Then the working electrode was thoroughly rinsed with water and polished with alumina powder. The second run was stopped until the maximum current position observed. Then the working electrode was washed with only water, and the third run was executed in the blank buffer solution without complexity. No catalytic current was observed in the third run. This test proves that catalytic hydrogen production occurs via a homogeneous pathway.

Before Bulk Electrolysis

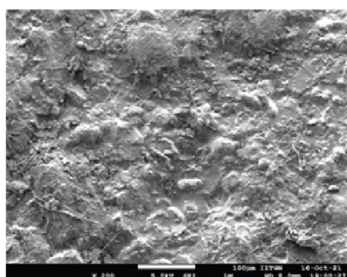

(A) FE-SEM

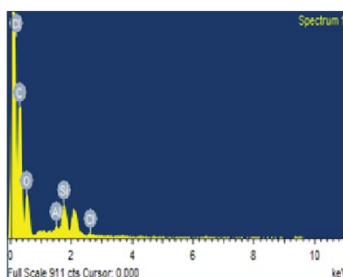

(B) EDS

| Element | Weight % | Atomic % |
|---------|----------|----------|
| C       | 66.03    | 73.48    |
| O       | 28.90    | 24.15    |
| Al      | 0.64     | 0.32     |
| Si      | 3.90     | 1.86     |
| Cl      | 0.53     | 0.20     |
| Total   | 100      | 100      |

(C) EDS Analysis

After Bulk Electrolysis

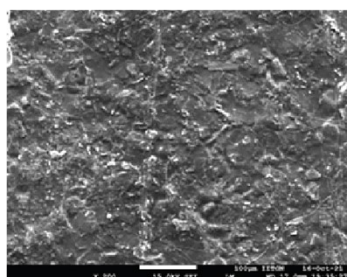

(D) FE-SEM

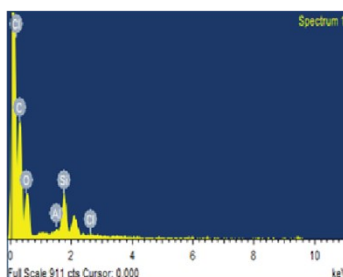

(E) EDS

| Element | Weight % | Atomic % |
|---------|----------|----------|
| C       | 63.00    | 70.87    |
| O       | 31.20    | 26.35    |
| Al      | 0.40     | 0.20     |
| Si      | 5.29     | 2.55     |
| Cl      | 0.10     | 0.04     |
| Total   | 100      | 100      |

(F) EDS Analysis

**Figure S16.** SEM figure and EDX spectra of the plastic chip working electrode before and after the bulk electrolysis of C3. No detectable amount of cobalt deposition was observed on the material during electrolysis.

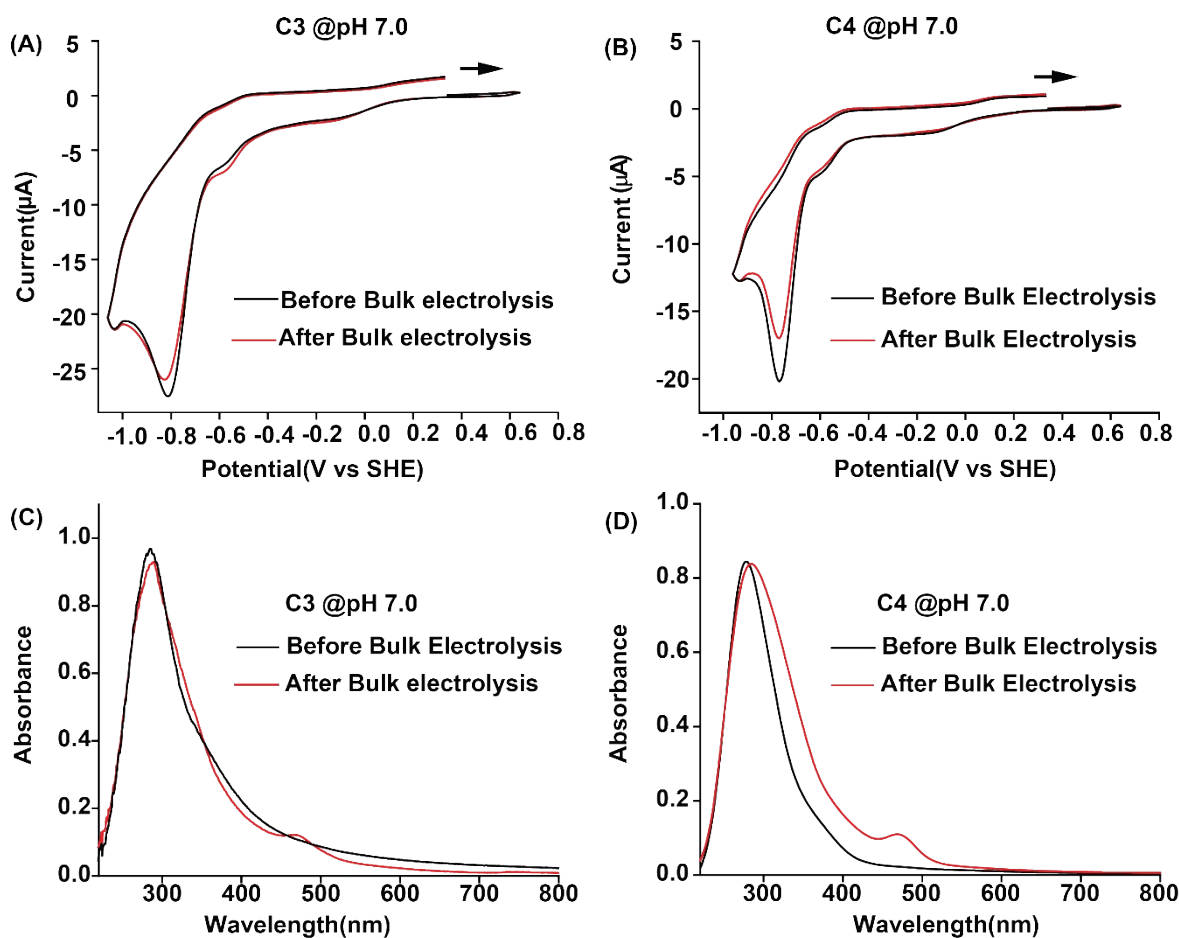

**Figure S17.** The comparative cyclic voltammetry (CV) data of (A) C3 and (B) C4 before (black trace) and after (red trace) following bulk electrolysis. The optical spectra recorded for (C) C3 and (D) C4 before (black trace) and after (red trace) following bulk electrolysis, the formation of Co(II) state is evident with the appearance of 470 nm band. All the data recorded at 298 K.

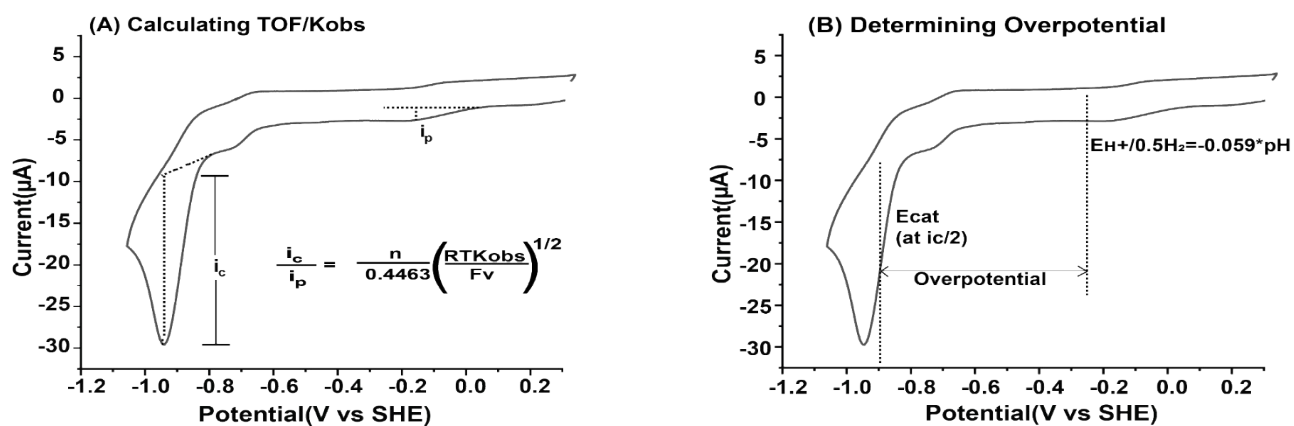

**Figure S18.** The representative cyclic voltammogram (CV) for the estimation of (A) stoichiometric ( $i_p$ ) and catalytic current ( $i_c$ ), along with (B) overpotential requirement (OP).



**Table S1. Optical features of C1-C4 in DMF and water media**

| complex | Medium           | $\pi-\pi^*$<br>$\lambda_{\max}/\text{nm}$<br>( $\epsilon \times 10^3 /$<br>$\text{M}^{-1}\text{cm}^{-1}$ ) | LMCT<br>$\lambda_{\max}/\text{nm}$<br>( $\epsilon / \text{M}^{-1}\text{cm}^{-1}$ ) | $d-d$<br>$\lambda_{\max}/\text{nm}$<br>( $\epsilon / \text{M}^{-1}\text{cm}^{-1}$ ) |
|---------|------------------|------------------------------------------------------------------------------------------------------------|------------------------------------------------------------------------------------|-------------------------------------------------------------------------------------|
| C1      | DMF              | 264(770)                                                                                                   | 316(185)<br>378(068)                                                               | 520(10)                                                                             |
|         | H <sub>2</sub> O | 249(760)                                                                                                   | 289(160)<br>353(060)                                                               | 512(10)                                                                             |
| C2      | DMF              | 262(1600)                                                                                                  | 314(371)<br>372(130)                                                               | 560(17)                                                                             |
|         | H <sub>2</sub> O | 246(1600)                                                                                                  | 299(350)<br>366(110)                                                               | 538(18)                                                                             |
| C3      | DMF              | 268(1600)                                                                                                  | 293(870)<br>379(900)                                                               | 550(20)                                                                             |
|         | H <sub>2</sub> O | 230(1920)                                                                                                  | 291(90)<br>380(20)                                                                 | 518(18)                                                                             |
| C4      | DMF              | 270(1096)                                                                                                  | 317(216)<br>378(068)                                                               | 535(16)                                                                             |
|         | H <sub>2</sub> O | 246(1510)                                                                                                  | 358.7(139)                                                                         | 512(17)                                                                             |

**Table S2. Stoichiometric redox potential of Co(III/II) and half-wave potential for Co(I) centric HER**

| pH | C1                        |                                         | C2                        |                                            | C3                        |                                            | C4                        |                                            |
|----|---------------------------|-----------------------------------------|---------------------------|--------------------------------------------|---------------------------|--------------------------------------------|---------------------------|--------------------------------------------|
|    | $-E_{Co^{III/II}}$<br>(V) | $-E_{cat/2}$ (mV)<br>[Co(I)<br>centric] | $-E_{Co^{III/II}}$<br>(V) | $-E_{cat/2}$<br>(mV)<br>[Co(I)<br>centric] | $-E_{Co^{III/II}}$<br>(V) | $-E_{cat/2}$<br>(mV)<br>[Co(I)<br>centric] | $-E_{Co^{III/II}}$<br>(V) | $-E_{cat/2}$<br>(mV)<br>[Co(I)<br>centric] |
| 7  | 0.234                     | 887                                     | 0.156                     | 812                                        | 0.189                     | 880                                        | 0.176                     | 814                                        |
| 6  | 0.133                     | 765                                     | 0.146                     | 757                                        | 0.186                     | 784                                        | 0.180                     | 781                                        |
| 5  | 0.064                     | 670                                     | 0.048                     | 670                                        | 0.170                     | 722                                        | 0.103                     | 693                                        |
| 4  | 0.109                     | 700                                     | 0.123                     | 739                                        | 0.121                     | 692                                        | 0.185                     | 741                                        |

**Table S3. Electrocatalytic and photocatalytic H<sub>2</sub> production parameters for C1-C4 complexes in variable pH conditions**

| Complex | Electrocatalytic | Photocatalytic at<br>pH 7.0 |
|---------|------------------|-----------------------------|
|         |                  |                             |

|           | pH 7.0                         |          | pH 6.0                 |                 | pH 5.0                 |                 | pH 4.0                 |                 | TON (vs. catalyst) |
|-----------|--------------------------------|----------|------------------------|-----------------|------------------------|-----------------|------------------------|-----------------|--------------------|
|           | TOF (s <sup>-1</sup> )         | OP (Mv)  | TOF (s <sup>-1</sup> ) | OP (Mv)         | TOF (s <sup>-1</sup> ) | OP (Mv)         | TOF (s <sup>-1</sup> ) | OP (Mv)         |                    |
| <b>C1</b> | <b>Complex</b>                 |          |                        |                 |                        |                 |                        |                 |                    |
|           | <b>pH</b>                      |          |                        |                 |                        |                 |                        |                 |                    |
|           |                                |          |                        |                 |                        |                 |                        |                 |                    |
|           | 900 ± 10                       | 477 ± 20 | 690 ± 15               | 420 ± 25        | 455 ± 12               | 375 ± 18        | 150 ± 10               | 534 ± 24        | 33 ± 5             |
|           | pH 7.0                         |          |                        | -0.95           |                        |                 | -1.1                   |                 | -1.1               |
|           | pH 5.0                         |          |                        | n.r.            |                        |                 | -0.97                  |                 | -0.97              |
| <b>C2</b> | 2500 ± 10                      | 397 ± 18 | 690 ± 13               | 404 ± 20        | 300 ± 14               | 377 ± 17        | 340 ± 10               | 330 ± 19        | 62 ± 3             |
|           | <b>Faradaic Efficiency (%)</b> |          |                        | 61 ± 5 (pH 7.0) |                        | 95 ± 5 (pH 7.0) |                        | 67 ± 5 (pH 7.0) |                    |
|           |                                |          |                        |                 |                        | 84 ± 5 (pH 5.0) |                        | 90 ± 5 (pH 5.0) |                    |
| <b>C3</b> | 6370 ± 5                       | 467 ± 20 | 8400 ± 8               | 429 ± 16        | 1800 ± 10              | 425 ± 18        | 90 ± 11                | 449 ± 17        | 245 ± 4            |
| <b>C4</b> | <b>Complex</b>                 |          |                        |                 |                        |                 |                        |                 |                    |
|           | <b>pH</b>                      |          |                        |                 |                        |                 |                        |                 |                    |
|           |                                |          |                        |                 |                        |                 |                        |                 |                    |
|           | 3716 ± 10                      | 435 ± 11 | 7100 ± 12              | 434 ± 17        | 862 ± 5                | 397 ± 16        | 93 ± 8                 | 514 ± 18        | 177 ± 5            |
|           |                                |          |                        | TON             |                        | TON             |                        | TON             |                    |
|           | pH 7.0                         |          |                        | 4.09 ± 0.50     |                        | 26.45 ± 1.50    |                        | 16.61 ± 1.50    |                    |
|           | pH 6.0                         |          |                        | n.r.            |                        | 125 ± 5.00      |                        | 92 ± 5.00       |                    |
|           | pH 5.0                         |          |                        | n.r.            |                        | 24.75 ± 1.50    |                        | 8.77 ± 0.50     |                    |

**Table S4. Bulk electrolysis parameters for complexes C1-C4**

**Table S5. Comparative TON data from bulk electrolysis data**

Experiment time: 2 hours; n.r. not recorded

**Table S6. Comparative catalytic data of contemporary cobalt-based catalysts with C1-C4**

| Sr. No | Molecular Cobalt catalyst | Electrocatalytic HER   |         | Photocatalytic HER | Ref |
|--------|---------------------------|------------------------|---------|--------------------|-----|
|        |                           | TOF (s <sup>-1</sup> ) | OP (mV) | TON                |     |
| 1      | <i>Ht-CoM61A</i>          | -                      | 830     | -                  | 4   |
| 2      | <i>Co (Iminopyridine)</i> | 2.20 h <sup>-1</sup>   | 450     | -                  | 5   |
| 3      | <i>CoGGH</i>              | -                      | 600     | 2200               | 6,7 |

|    |                                              |             |            |       |                  |
|----|----------------------------------------------|-------------|------------|-------|------------------|
| 4  | $Co(DmgBF_2)_2(CH_3CN)_2$                    | -           | 442        | -     | 8                |
| 5  | $Co(dmgs)_2(4\text{-pyridine tyrosine})Cl$   | 8830        | 507        | -     | 2                |
| 6  | $Co\text{-salen tyrosine}$                   | 190         | 775        | -     | 9                |
| 7  | $Co(dmgs)_2(4\text{-ethylamine pyridine})Cl$ | 3800        | 457        | -     | 10               |
| 8  | $CoMP11\text{-Ac}$                           | -           | 852        | 905   | 11               |
| 9  | $CoMC6^*a$                                   | 680         | -          | 10400 | 12,13            |
| 10 | $(1\text{-Iaa})Co(dmgs)_2Cl$                 | 3280        | 454        | 9200  | 14               |
| 11 | $(4\text{-Iaa})Co(dmgs)_2Cl$                 | 4925        | 428        |       |                  |
| 12 | $(Histidine)Co(dmgs)_2Cl$                    | 4525        | 477        | 12180 |                  |
| 13 | $Co(dmgs)_2Cl\text{-PO}_3H$                  | 1370        | 373        |       | 15               |
| 14 | <b>C1</b>                                    | <b>900</b>  | <b>475</b> | 21    | 2,3              |
| 15 | <b>C2</b>                                    | <b>2500</b> | <b>390</b> | 42    | <b>This work</b> |
| 16 | <b>C3</b>                                    | <b>8400</b> | <b>465</b> | 330   | <b>This work</b> |
| 17 | <b>C4</b>                                    | <b>7100</b> | <b>405</b> | 280   | <b>This work</b> |

## References:

- (1) Perween, M.; Parmar, D. B.; Bhadu, G. R.; Srivastava, D. N. Polymer–Graphite Composite: A Versatile Use and Throw Plastic Chip Electrode. *Analyst* **2014**, *139* (22), 5919–5926. <https://doi.org/10.1039/C4AN01405G>.
- (2) Dolui, D.; Khandelwal, S.; Shaik, A.; Gaat, D.; Thiruvencatam, V.; Dutta, A. Enzyme-Inspired Synthetic Proton Relays Generate Fast and Acid-Stable Cobalt-Based H<sub>2</sub> Production Electrocatalysts. *ACS Catal.* **2019**, *9* (11), 10115–10125. <https://doi.org/10.1021/acscatal.9b02953>.
- (3) Razavet, M.; Artero, V.; Fontecave, M. Proton Electroreduction Catalyzed by Cobaloximes: Functional Models for Hydrogenases. *Inorg. Chem.* **2005**, *44* (13), 4786–4795. <https://doi.org/10.1021/ic050167z>.
- (4) Kandemir, B.; Chakraborty, S.; Guo, Y.; Bren, K. L. Semisynthetic and Biomolecular Hydrogen Evolution Catalysts. *Inorg. Chem.* **2016**, *55* (2), 467–477. <https://doi.org/10.1021/acs.inorgchem.5b02054>.
- (5) Stubbert, B. D.; Peters, J. C.; Gray, H. B. Rapid Water Reduction to H<sub>2</sub> Catalyzed by a Cobalt Bis(Iminopyridine) Complex. *J. Am. Chem. Soc.* **2011**, *133* (45), 18070–18073. <https://doi.org/10.1021/ja2078015>.
- (6) Kleingardner, J. G.; Kandemir, B.; Bren, K. L. Hydrogen Evolution from Neutral Water under Aerobic Conditions Catalyzed by Cobalt Microperoxidase-11. *J. Am. Chem. Soc.* **2014**, *136* (1), 4–7. <https://doi.org/10.1021/ja406818h>.
- (7) Chakraborty, S.; Edwards, E. H.; Kandemir, B.; Bren, K. L. Photochemical Hydrogen Evolution from Neutral Water with a Cobalt Metallopeptide Catalyst. *Inorg. Chem.* **2019**, *58* (24), 16402–16410. <https://doi.org/10.1021/acs.inorgchem.9b02067>.
- (8) Berben, L. A.; Peters, J. C. Hydrogen Evolution by Cobalt Tetraimine Catalysts Adsorbed on Electrode Surfaces. *Chem. Commun.* **2010**, *46* (3), 398–400. <https://doi.org/10.1039/B921559J>.
- (9) Khandelwal, S.; Zamader, A.; Nagayach, V.; Dolui, D.; Mir, A. Q.; Dutta, A. Inclusion of Peripheral Basic Groups Activates Dormant Cobalt-Based Molecular Complexes for Catalytic H<sub>2</sub> Evolution in Water. *ACS Catal.* **2019**, *9* (3), 2334–2344. <https://doi.org/10.1021/acscatal.8b04640>.
- (10) Dolui, D.; Mir, A. Q.; Dutta, A. Probing the Peripheral Role of Amines in Photo- and

- Electrocatalytic H<sub>2</sub> Production by Molecular Cobalt Complexes. *Chem. Commun.* **2020**, 56 (94), 14841–14844. <https://doi.org/10.1039/D0CC05786J>.
- (11) Edwards, E. H.; Jelušić, J.; Chakraborty, S.; Bren, K. L. Photochemical Hydrogen Evolution from Cobalt Microperoxidase-11. *J. Inorg. Biochem.* **2021**, 217, 111384. <https://doi.org/10.1016/j.jinorgbio.2021.111384>.
- (12) Firpo, V.; Le, J. M.; Pavone, V.; Lombardi, A.; Bren, K. L. Hydrogen Evolution from Water Catalyzed by Cobalt-Mimochrome VI\*a, a Synthetic Mini-Protein. *Chem. Sci.* **2018**, 9 (45), 8582–8589. <https://doi.org/10.1039/C8SC01948G>.
- (13) Edwards, E. H.; Le, J. M.; Salamatian, A. A.; Peluso, N. L.; Leone, L.; Lombardi, A.; Bren, K. L. A Cobalt Mimochrome for Photochemical Hydrogen Evolution from Neutral Water. *J. Inorg. Biochem.* **2022**, 230, 111753. <https://doi.org/10.1016/j.jinorgbio.2022.111753>.
- (14) Dolui, D.; Das, S.; Bharti, J.; Kumar, S.; Kumar, P.; Dutta, A. Bio-Inspired Cobalt Catalyst Enables Natural-Sunlight-Driven Hydrogen Production from Aerobic Neutral Aqueous Solution. *Cell Rep. Phys. Sci.* **2020**, 1 (1), 100007. <https://doi.org/10.1016/j.xcrp.2019.100007>.
- (15) Mir, A. Q.; Saha, S.; Mitra, S.; Guria, S.; Majumder, P.; Dolui, D.; Dutta, A. The Rational Inclusion of Vitamin B6 Boosts Artificial Cobalt Complex Catalyzed Green H<sub>2</sub> Production. *Sustain. Energy Fuels* **2022**, 6 (18), 4160–4168. <https://doi.org/10.1039/D2SE00734G>.
